# Supplementary material for: Deconvoluting simulated metagenomes: the performance of hard- and soft- clustering algorithms applied to metagenomic chromosome conformation capture (3C)
Source: PubMed Central journal article supplement (PMC5103821; doi:10.7717/peerj.2676), 2016-11-08
Supplement: peerj-04-2676-s001.pdf [file peerj-04-2676-s001.pdf]

| $\alpha_{BL}$ | Star   |        |               | Ladder          |               |           |
|---------------|--------|--------|---------------|-----------------|---------------|-----------|
|               | ANI    | 1-ANI  | $d_{**}$      | $d_{A,[B C D]}$ | $d_{B,[C D]}$ | $d_{C,D}$ |
| 0.0250        | 0.9950 | 0.0050 | <u>0.0050</u> | 0.0075          | <u>0.0050</u> | 0.0025    |
| 0.0377        | 0.9930 | 0.0070 | <u>0.0075</u> | 0.0113          | <u>0.0075</u> | 0.0038    |
| 0.0568        | 0.9890 | 0.0110 | <u>0.0114</u> | 0.0170          | <u>0.0114</u> | 0.0057    |
| 0.0855        | 0.9830 | 0.0170 | <u>0.0171</u> | 0.0257          | <u>0.0171</u> | 0.0086    |
| 0.1288        | 0.9750 | 0.0250 | <u>0.0258</u> | 0.0387          | <u>0.0258</u> | 0.0129    |
| 0.1941        | 0.9630 | 0.0370 | <u>0.0388</u> | 0.0582          | <u>0.0388</u> | 0.0194    |
| 0.2924        | 0.9460 | 0.0540 | <u>0.0585</u> | 0.0877          | <u>0.0585</u> | 0.0292    |
| 0.4405        | 0.9230 | 0.0770 | <u>0.0881</u> | 0.1322          | <u>0.0881</u> | 0.0441    |
| 0.6637        | 0.8900 | 0.1100 | <u>0.1327</u> | 0.1991          | <u>0.1327</u> | 0.0664    |
| 1.0000        | 0.8470 | 0.1530 | <u>0.2000</u> | 0.3000          | <u>0.2000</u> | 0.1000    |
